# Supplementary material
Source: HighWire-hosted journal article supplement (http://www.jneurosci.org/highwire/filestream/601125/field_highwire_adjunct_files/4/Supplemental_Material.pdf)
Supplement: Supplemental_Material.pdf [file Supplemental_Material.pdf]

## Supplemental Figure Legends

**Supplemental Figure 1.** G-CaMP sensors detect axotomy-induced calcium transients in PLM. (A) Comparison of fluorescence intensity change ( $\Delta F/F_0$ ) in PLM after axotomy using GFP label (green trace, *zdis5*), and in *Pmec-4*-G-CaMP 2.0 (*juEx2116*) with (red) or without axotomy (blue). Traces are representative; fluorescence was measured in a 12  $\mu\text{m}$  long ROI as in Figure 1. (B) Dot plot of maximal  $\Delta F/F_0$  from the groups in (A). (C) PLM regrowth is not significantly different between *Pmec-7*-GFP(*mul32*), *Pmec-4*-GFP(*zdis5*), or *Pmec-4*-G-CaMP 2.0 (*juEx2166*) transgenic backgrounds. (D) Incubation in liquid increases total regrowth. *Pmec-4*-GFP(*zdis5*) worms were grown on NGM agar plates, in M9 buffer, or in M9 buffer with DMSO. (E) Overnight incubation in 1 mM BAPTA-AM prior to axotomy did not affect  $\Delta F/F_0$ . (F) BAPTA-AM treatment reduces regrowth at 10 h. n (in bars) = total number of axons, at least two independent experimental groups. Statistics: ANOVA (panel D) or Student t test, \*,  $P < 0.05$ ; \*\*\*,  $P < 0.001$ .

**Supplemental Figure 2** PLM morphology in mutants with elevated  $\text{Ca}^{2+}$  or cAMP. (A) The PLM branch is normally located close to the anterior end of the PLM process (~78% of axon length) in *mul32* transgenic animals. In approximately 50% of *zdis5* animals the branch forms more posteriorly (top panel), 50-60  $\mu\text{m}$  from the cell body. This ‘posterior branching’ is not observed in *pde-4* or *egl-19(gf)* mutants in the *zdis5* background (quantitation in c). Scale, 10  $\mu\text{m}$ . (B) PLM process length measured in mid-L4 stage is slightly increased in *egl-19(gf)* but not in *pde-4(lf)* or *egl-19 pde-4* double mutants. Mean

$\pm$  SD,  $P < 0.01$  by ANOVA. (C) *zdis5* transgenic animals display a posterior synaptic branch phenotype that is suppressed in *pde-4* and *egl-19(gf)* mutants.

**Supplemental Figure 3** Contributions of calcium sources to regenerative growth

(A) The partial loss of function mutation *egl-19(ad1006)* does not affect the amplitude of the G-CaMP transient. (B) PLM regrowth is not significantly affected by null mutations in *unc-2*, *unc-36*, *crt-1*, or *unc-68*. Partial loss of function mutations in *egl-19(ad1006)* or *itr-1(sa73)* do not affect regrowth. (C) Nemapipine-A treatment does not affect baseline G-CaMP intensity. Statistics: t test; ns, not significant.

**Supplemental Figure 4** Morphology of PLM axon regrowth in *eff-1* mutants. (A)

typical morphology proximal axon in *eff-1(ok1031) mul32* animals; (B) the regrowing axon is highly branched around the distal fragment and does not reconnect. (C) Total levels of regrowth are reduced in *eff-1* mutants. Statistics, t test; \*,  $P < 0.05$ .

### **Supplemental Video Legends**

All videos, except #2, are spinning disk confocal movies of *Pmec-4-G-CaMP* transgenic PLM neurons severed ~50  $\mu\text{m}$  from the cell body, with intensity color coded. See Methods for imaging conditions.

Video 1. Representative *Pmec-4-G-CaMP* (*juEx2116*) fluorescence in PLM before and after femtosecond laser axotomy.

Video 2. GFP fluorescence (transgene *zdis5*) is unaffected by PLM axotomy.

Video 3. Although treatment with BAPTA-AM reduces the baseline fluorescence intensity of G-CaMP in PLM axon, it does not affect the relative increase following axotomy.

**Supplemental Table 1.** DNA constructs and transgenes

| Gene/construct          | DNA clone                                 | Transgenic arrays                   |
|-------------------------|-------------------------------------------|-------------------------------------|
| PDE-4                   | <i>Pmec-4</i> -PDE-4<br>pCZGY562          | <i>juEx1795-1798, 1800, 2419</i>    |
| G-CaMP 2.0              | <i>Pmec-4</i> -G-CaMP2.0<br>pCZGY905      | <i>juEx2115, juEx2116</i>           |
| ITR-1 Control<br>Sponge | <i>Pmec-4</i> -control sponge<br>pCZGY911 | <i>juEx2412-2414</i>                |
| ITR-1 Sponge            | <i>Pmec-4</i> -sponge<br>pCZGY910         | <i>juEx2424, juEx2425</i>           |
| Super Sponge            | <i>Pmec-4</i> -super sponge<br>pCZGY912   | <i>juEx2410, juEx2411, juEx2418</i> |

Experimental DNAs were injected at 50 ng/ $\mu$ l with the exception of *Pmec-4*-G-CaMP 2.0 (100 ng/ $\mu$ l). All transgenes use *Pttx-3*-RFP or *Pttx-3*-GFP as coinjection marker to total DNA concentration of 100-150 ng/ $\mu$ l.
